1 **Title: Endocast and bony labyrinth of a stem gnathostome shed light on the earliest**  
2 **diversification of jawed vertebrates**

3

4 **Authors:** You-an Zhu<sup>1,2†</sup>, Sam Giles<sup>3,4†</sup>, Gavin Young<sup>5,6</sup>, Yuzhi Hu<sup>5</sup>, Mohamad Bazzi<sup>2</sup>, Per E.  
5 Ahlberg<sup>2</sup>, Min Zhu<sup>1,7,8</sup> and Jing Lu<sup>1,7\*</sup>

6 **Affiliations:**

7 <sup>1</sup>Key Laboratory of Vertebrate Evolution and Human Origins of Chinese Academy of Sciences,  
8 Institute of Vertebrate Paleontology and Paleoanthropology, Chinese Academy of Sciences,  
9 Beijing 100044, China.

10 <sup>2</sup>Subdepartment of Evolution and Development, Department of Organismal Biology, Uppsala  
11 University, Norbyvägen 18A, SE-752 36 Uppsala, Sweden.

12 <sup>3</sup>School of Geography Earth and Environmental Sciences, University of Birmingham,  
13 Birmingham, UK, B15 2TT.

14 <sup>4</sup>Department of Earth Sciences, Natural History Museum, Cromwell Road, London SW7 5BD,  
15 UK

16 <sup>5</sup>Department of Applied Mathematics, Research School of Physics, Australian National  
17 University, Canberra, ACT, Australia 2601.

18 <sup>6</sup>Australian Museum Research Institute, Sydney, NSW, Australia 2010.

19 <sup>7</sup>CAS Center for Excellence in Life and Paleoenvironment, Beijing 100044, China.

20 <sup>8</sup>University of Chinese Academy of Sciences Beijing 100039, China.

21 <sup>†</sup>These authors contributed equally to this work.

22 \*Correspondence to: [lujing@ivpp.ac.cn](mailto:lujing@ivpp.ac.cn).

23

24 **One Sentence Summary: The skull of a 400-million-year old fossil fish suggests that**  
25 **hypotheses of early jawed vertebrate relationships might have to be turned on their**  
26 **head.**

27

28 **Abstract:**

29 Our understanding of the earliest evolution of jawed vertebrates depends on a credible  
30 phylogenetic assessment of the jawed stem gnathostomes collectively known as ‘placoderms’.  
31 However, their relationships, and even whether ‘placoderms’ represent a single radiation or a  
32 paraphyletic array, remain contentious. Here we describe the endocranial cavity and inner ear of  
33 *Brindabellaspis stensioi*, commonly recovered as a taxon of uncertain affinity branching near the  
34 base of ‘placoderms’. While some features of its braincase and endocast resemble those of  
35 jawless vertebrates, its inner ear displays a repertoire of crown gnathostome characters. Both  
36 parsimony and Bayesian analyses suggest that established hypotheses of ‘placoderm’  
37 relationships are unstable, with newly-revealed anatomy pointing to a potentially radical revision  
38 of early gnathostome evolution. Our results call into question the appropriateness of fusiform  
39 ‘placoderms’ as models of primitive gnathostome anatomy and raise questions of homology  
40 relating to key cranial features.

41 **Main text:** One of the major transitions in vertebrate history was the evolution of gnathostomes,  
42 or jawed vertebrates, from jawless ancestors. The major morphological gap apparent when  
43 considering only living vertebrate diversity—extant jawless fishes comprise just hagfish and  
44 lamprey—is largely filled in by the fossil record (1). ‘Placoderms’, the most crownward  
45 assemblage on the gnathostome stem, occupy a pivotal place in this discussion. Traditional  
46 hypotheses of relationships posit a monophyletic Placodermi (2–4), whereas most recent analyses  
47 recover (2–13) ‘placoderms’ as a paraphyletic array from which crown gnathostomes arose (5–  
48 11); but see ref (12). In either scenario, taxa recovered near the base of the assemblage are  
49 typically dorsoventrally compressed, benthic forms—anatomically similar to agnathan  
50 outgroups—with fusiform, nektonic taxa recovered proximate to the gnathostome crown (1,5,6,8–  
51 10); but see ref (11). Uncertainty surrounding the relationships between different ‘placoderm’  
52 groups, as well as their broader taxonomic status, are compounded by an uneven understanding of

53 anatomy across the radiation, particularly of the phylogenetically informative braincase and brain  
54 cavity—endocast (see Supplementary Materials).

55 *Brindabellaspis stensioi* (13) is a ‘placoderm’-grade stem gnathostome from the Early  
56 Devonian of New South Wales, Australia. Although almost exclusively recovered among the  
57 earliest diverging ‘placoderms’ (5,6–8,10–11,14–16), it has variably been allied with rhenanids  
58 (13) acanthothoracids (4) and antiarchs (12), some of which are of dubious monophyly.

59 Comparisons with jawless fishes have frequently been drawn on the basis of gross external and  
60 braincase anatomy (13) and general proportions of the endocast (1, 17). Other distinctive features,  
61 such as a large endolymphatic cavity, have been interpreted as autapomorphies (13, 18). Here, we  
62 provide high-resolution CT data of two more recently discovered specimens (Fig. 1, Fig. S1–4),  
63 detailing unexplored parts of the endocast and allowing previously described regions of the  
64 braincase and skull roof to be reinterpreted.

65 Tomographic data reveals the position of dermal bone sutures, clarifying the structure of  
66 the skull roof. Unlike in previous interpretations (13,19), we identify an independent median  
67 pineal plate sitting posterior to the rostromedial. We also confirm the presence of four bones  
68 contributing to the lateral margin of the skull roof, contra refs (13,19). *Brindabellaspis* possesses  
69 an elongate ossification (postmarginal) flanking the serial lateral line-bearing bones, resembling  
70 maxillate ‘placoderms’ (6,10) and early osteichthyans (20); in most other ‘placoderms’, the  
71 postmarginal is either much reduced or lost (3).

72 Broadly speaking, our results affirm past descriptions of the endocavity (13), although  
73 with key clarifications and additions. The extremely short telencephalic region of the endocast  
74 has a flat anterior face with no bulge anterior to the olfactory and terminal nerves, contra ref (13)  
75 (Fig. 1c and e). CT data also clarify that, as in crown gnathostomes (8,21,22), the ventral sides of  
76 the telencephalic and diencephalic cavities are smooth and continuous between the optic nerve  
77 and hypophysis, rather than displaying a step-like transition as in most ‘placoderms’ (18,23) (Fig.  
78 S5). We also confirm that the hypophysis is oriented anteriorly (13) (Fig. 1e). Although an

79 anteriorly (or ventrally) directed hypophysis has sometimes been considered restricted to  
80 agnathans and ‘placoderms’ (18), it is also reported in crown gnathostomes (16,22,24). Characters  
81 previously suggested as being shared between agnathans and *Brindabellaspis*, such as a laterally  
82 expansive cerebellum and anteroposteriorly elongate vagus complex (Fig. 1d and f, Fig. S3), are  
83 now known to be widespread in other stem and crown gnathostomes (16,18,22) (Fig. 2 and Fig.  
84 S5), and are presumably plesiomorphic for the gnathostome crown. As described by Young (13),  
85 the olfactory tracts are elongate, and diverge anteriorly towards the widely separated and laterally  
86 positioned nasal capsules (Fig. 1c and Fig. 2, Fig. S3a-d). Divergent olfactory tracts are otherwise  
87 only known in crown gnathostomes (16,21,22) in other ‘placoderms’ and the galeaspid *Shuyu* (25)  
88 the olfactory tracts are parallel and typically short (Fig. 2). The myelencephalic region of the  
89 endocast anterior to the vagus nerve, which is usually proportionately long in most ‘placoderms’  
90 (Fig. 2 and Fig. S5d-g) but short in agnathans and crown gnathostomes (Fig. 2 and Fig. S5a-c, h-  
91 m), appears intermediate in length in *Brindabellaspis*.

92 Our CT data reveal important new anatomical details of the bony labyrinth and  
93 endolymphatic complex. In addition to features identified in the endocast, the bony labyrinth of  
94 *Brindabellaspis* (Fig. 1c-f, Fig. 2, Fig. S4) bears unexpected similarities to those of crown  
95 gnathostomes, with considerable difference to those of other ‘placoderms’. The labyrinth is  
96 anteroposteriorly short, and all three semicircular canals have large diameters. The anterior  
97 semicircular canal is significantly shorter than its posterior counterpart, and in dorsal view the  
98 two diverge at a much smaller angle than in other ‘placoderms’ such as the rhenanid *Jagorina*  
99 and arthrodire *Kujdanowiaspis* (Figs. 1c-f and 3, Fig. S4). Most strikingly, CT data demonstrate  
100 that the anterior and posterior semicircular canals of *Brindabellaspis* join in a crus commune,  
101 with a pronounced sinus superior developed ventrally. This configuration is typical of crown  
102 gnathostomes (16,21,22), and the combination is unknown in other ‘placoderms’ (Fig. 3). There  
103 is no significant preampullary portion of the posterior semicircular canal, and the utriculus does

104 not separate the anterior and external semicircular canals (both contra the condition in all known  
105 ‘placoderms’ except *Romundina* (18)). While incomplete ventrally, the curvature of the sacculus  
106 suggests that it is significantly smaller than in other ‘placoderms’, barely protruding laterally (Fig.  
107 2 and Fig. 3). It is also restricted ventral to the plane of the external semicircular canal, a  
108 condition seen elsewhere only in crown gnathostomes (Fig. 2 and Fig. 3). Despite the lack of an  
109 external semicircular canal or utricular chamber in agnathans (25), a number of labyrinth  
110 characters can be polarised across the jawless-jawed vertebrate transition. Osteostracans possess  
111 small angles between anterior and posterior semicircular canals, and a crus commune but no  
112 developed sinus superior (Fig. 3).

113         Although previously considered autapomorphic (13), our data allow similarities to be drawn  
114 between the endolymphatic systems of *Brindabellaspis* and crown gnathostomes. The complex in  
115 *Brindabellaspis* can be divided into three distinct sections: a large, well-developed endolymphatic  
116 sac; an ascending duct connecting the vestibular chamber to the endolymphatic sac; and a distal  
117 duct extending from the sac, through the dermal bone, and opening externally (Figs. 1d-f, Fig. 2  
118 and Fig. 3, Fig. S4a, d-f). There is no “second sac”, contra ref (18). In both jawless and jawed  
119 stem gnathostomes, the endolymphatic complex is a simple tube-like structure that extends  
120 unidirectionally, and is positioned close to the labyrinth (17,18,23,25). In contrast, the crown  
121 gnathostome system is more complex and divided into three distinct regions (26), much as in  
122 *Brindabellaspis*, and located mesially, closer to the brain cavity than the labyrinth (27,28) (Fig. 2  
123 and Fig. 3).

124         A revised and expanded morphological matrix, analysed under both parsimony and Bayesian  
125 frameworks, provides novel—and conflicting—insights into early gnathostome evolution. Under  
126 parsimony analysis, jaw-bearing gnathostomes fall into one of two monophyletic groups (Fig. 3  
127 and Fig. S7a). The more stemward of these contains the bulk of traditionally-recognised  
128 ‘placoderms’, albeit with arthodires representing a nested radiation within this clade.

129 Unexpectedly, *Brindabellaspis* is recovered as the earliest diverging member of a clade  
130 comprising, successively: antiarchs, maxillate ‘placoderms’, and crown gnathostomes. The  
131 position of antiarchs as proximate to the gnathostome crown, with arthrodires representing an  
132 independently fusiform radiation, is unexpected (1,5,6,8–10); but see ref (12), and perhaps  
133 indicates the importance of endocranial data and previous biases towards external morphology.  
134 The endocavities of *Minicrania* (29) and *Phymolepis* (30) hint at the presence of a mesially-  
135 directed endolymphatic duct and an endolymphatic sac, as well as a relatively short hindbrain.  
136 Although not included in the phylogenetic analysis, these anatomical similarities between the  
137 endocrania of antiarchs and *Brindabellaspis*—and, by extension, the gnathostome crown—lend  
138 support to the hypothesis of relationships suggested in our parsimony results. However, support  
139 values amongst early gnathostomes are low, and the proximity of antiarchs to the gnathostome  
140 crown node raises several questions of homology. The transition from posteriorly-positioned to  
141 anteriorly-positioned nasal capsules, as well as changes to jaw suspension, are now optimised as  
142 evolving twice: once within the clade comprising *Romundina*, rhenanids, ptyctodonts,  
143 petalichthyids and arthrodires; and once within the clade comprising maxillate ‘placoderms’ and  
144 crown gnathostomes. The recovery of arthrodires as removed from maxillate ‘placoderms’ plus  
145 crown gnathostomes also requires a number of homoplasies in the skull roof and trunk armour.

146         Results under Bayesian analyses differ from our parsimony analysis and recall more  
147 common hypotheses of placoderm paraphyly (1,5,6,8–10), with antiarchs recovered as the  
148 earliest-diverging ‘placoderm’ clade and arthrodires as sister taxa to maxillate ‘placoderms’ and  
149 the gnathostome crown. Outside of these nodes, however, other ‘placoderms’—including  
150 *Brindabellaspis*—fall in a polytomy, and arthrodires are recovered as paraphyletic. Resolving this  
151 conflict represents a fundamental challenge of early gnathostome evolution, and is one that  
152 cannot be resolved without detailed CT-based reassessment of the anatomy of key ‘placoderm’  
153 taxa.

154 Our work adds considerably to knowledge of labyrinth and endocast variation across stem  
155 gnathostomes, highlighting the major impact that CT-based descriptions and re-examination of  
156 key taxa can have on both phylogenetic resolution and schemes of morphological evolution. The  
157 unexpected character combination in *Brindabellaspis* suggests that endocranial characters  
158 previously considered exclusive to crown gnathostome are likely widely distributed amongst a  
159 diversity of stem jawed vertebrates. However, outstanding questions remain about the homology  
160 of features common to both arthrodires and crown gnathostomes, notably in the skull roof and  
161 nasal capsules. The conflicting phylogenetic hypotheses of relationships presented here highlight  
162 major uncertainties on the gnathostome stem, calling into question long-standing assumptions  
163 about patterns of character evolution. Recent work on the diversity of ‘acanthothoracid’  
164 dentitions, also revealed by CT data, suggests a more complex picture of dental character  
165 evolution and provides independent evidence that at least some ‘acanthothoracids’ may branch  
166 closer to the gnathostome crown node than previously thought (11). Notably, the position of  
167 arthrodires as removed from maxillate ‘placoderms’ plus crown gnathostomes challenges  
168 previous installations of fusiform, arthrodire-like taxa as a representative of the primitive  
169 gnathostome condition (10,23,31).

170

#### 171 **References and Notes:**

- 172 1. P. Janvier, *Early Vertebrates* (Clarendon Press; Oxford University Press, Oxford, 1996)
- 173 2. G. C. Young, The relationships of placoderm fishes. *Zool. J. Linn. Soc.* **88**, 1–57 (1986).
- 174 3. G. C. Young, Placoderms (armored fish): dominant vertebrates of the Devonian period.  
175 *Annu. Rev. Earth Planet. Sci.* **38**, 523–550 (2010).
- 176 4. D. Goujet, G. C. Young. in *Recent Advances in the Origin and Early Radiation of*  
177 *Vertebrates* (eds G. Arratia, M. V. H. Wilson, & R. Cloutier) 109–126 (Verlag Dr.  
178 Friedrich Pfeil, 2004).

- 179 5. M. D. Brazeau, The braincase and jaws of a Devonian ‘acanthodian’ and modern  
180 gnathostome origins. *Nature* **457**, 305–308 (2009).
- 181 6. M. Zhu, X. Yu, P. E. Ahlberg, B. Choo, J. Lu, T. Qiao, Q. Qu, W. Zhao, L. Jia, H. Blom,  
182 Y. Zhu, A Silurian placoderm with osteichthyan-like marginal jaw bones. *Nature* **502**,  
183 188–193 (2013).
- 184 7. M. D. Brazeau, M. Friedman, The origin and early phylogenetic history of jawed  
185 vertebrates. *Nature* **520**, 490–497 (2015).
- 186 8. S. Giles, M. Friedman, M. D. Brazeau, Osteichthyan-like cranial conditions in an Early  
187 Devonian stem gnathostome. *Nature* **520**, 82–85 (2015).
- 188 9. J. A. Long, E. Mark-Kurik, Z. Johanson, M. S. Y. Lee, G. C. Young, Z. Min, P. E.  
189 Ahlberg, M. Newman, R. Jones, J. den Blaauwen, B. Choo, K. Trinajstić, Copulation in  
190 antiarch placoderms and the origin of gnathostome internal fertilization. *Nature* **517**,  
191 196–199 (2015).
- 192 10. Zhu, M. *et al.* A Silurian maxillate placoderm illuminates jaw evolution. *Science* **354**,  
193 334–336 (2016).
- 194 11. V. Vaškaninová, D. Chen, P. Tafforeau, Z. Johanson, B. Ekrt, H. Blom, P. E. Ahlberg,  
195 Marginal dentition and multiple dermal jawbones as the ancestral condition of jawed  
196 vertebrates. *Science* **369**, 211–216 (2020).
- 197 12. B. King, T. Qiao, M. S. Y. Lee, M. Zhu, J. A. Long, Bayesian morphological clock  
198 methods resurrect placoderm monophyly and reveal rapid early evolution in jawed  
199 vertebrates. *Syst. Biol.* **66**, 599–516 (2016).
- 200 13. G. C. Young, A new Early Devonian placoderm from New South Wales, Australia, with  
201 a discussion of placoderm phylogeny. *Palaeontogr. Abt. A* **167**, 10–76 (1980).
- 202 14. S. P. Davis, J. A. Finarelli, M. I. Coates, *Acanthodes* and shark-like conditions in the last  
203 common ancestor of modern gnathostomes. *Nature* **486**, 247–250 (2012).



- 204 15. T. Qiao, B. King, J. A. Long, P. E. Ahlberg, M. Zhu, Early gnathostome phylogeny  
205 revisited: multiple method consensus. *PLoS One* **11**, e0163157 (2016).
- 206 16. A. M. Clement, B. King, S. Giles, B. Choo, P. E. Ahlberg, G. C. Young, J. A. Long,  
207 Neurocranial anatomy of an enigmatic Early Devonian fish sheds light on early  
208 osteichthyan evolution. *eLife*. **7**, e34349 (2018).
- 209 17. P. Janvier, The relationships of the Osteostraci and Galeaspida. *J. Vertebr. Paleontol.***4**,  
210 344–358 (1984).
- 211 18. V. Dupret, S. Sanchez, D. Goujet, P. E. Ahlberg, The internal cranial anatomy of  
212 *Romundina stellina* Orvig, 1975 (Vertebrata, Placodermi, Acanthothoraci) and the origin  
213 of jawed vertebrates-Anatomical atlas of a primitive gnathostome. *PLoS One* **12**,  
214 e0171241 (2017).
- 215 19. B. King, G. C. Young, J. A. Long, New information on *Brindabellaspis stensioi* Young,  
216 1980, highlights morphological disparity in Early Devonian placoderms. *R. Soc. Open Sci.*  
217 **5**, 180094 (2018).
- 218 20. M. Zhu, W. Zhao, L. Jia, J. Lu, T. Qiao, Q. Qu, The oldest articulated osteichthyan  
219 reveals mosaic gnathostome characters. *Nature*. **458**, 469–474 (2009).
- 220 21. J. G. Maisey, Braincase of the Upper Devonian shark *Cladodoides wildungensis*  
221 (Chondrichthyes, Elasmobranchii), with observations on the braincase in early  
222 chondrichthyans. *Bull. Am. Mus. Nat. Hist.* **288**, (2005).
- 223 22. S. Giles, M. Friedman, Virtual reconstruction of endocast anatomy in early ray-finned  
224 fishes (Osteichthyes, Actinopterygii), *J. Paleontol.* **88**, 636–651 (2014).
- 225 23. E. A. Stensiö, Anatomical studies on the arthrodiran head. Part 1. Preface, geological and  
226 geographical distribution, the organization of the head in the Dolichothoraci,  
227 Coccosteomorphi and Pachyosteomorphi. Taxonomic appendix. *Kgl. Svenska.*  
228 *Vetenskapsakad. Handl.* **9**, 1–419 (1963).

- 229 24. M. I. Coates, Endocranial preservation of a Carboniferous actinopterygian from  
230 Lancashire, U.K., and the interrelationships of primitive actinopterygians. *Philos. Trans.*  
231 *R. Soc. Lond. B. Biol. Sci.* **354**, 435–462 (1999).
- 232 25. Z. Gai, P. C. J. Donoghue, M. Zhu, P. Janvier, M. Stampanoni, Fossil jawless fish from  
233 China foreshadows early jawed vertebrate anatomy. *Nature* **476**, 324–327 (2011).
- 234 26. Jayne M. Gardiner, Robert E. Hueter, Karen P. Maruska, Joseph A. Sisneros, Brandon M.  
235 Casper, David A. Mann, Leo S. Demski, Sensory physiology and behavior of  
236 elasmobranchs, in *Biology Of Sharks And Their Relatives* 325–368 (CRC Press, 2004).
- 237 27. M. I. Coates, R. W. Gess, J. A. Finarelli, K. E. Criswell, K. Tietjen, A symmoriiform  
238 chondrichthyan braincase and the origin of chimaeroid fishes. *Nature* **541**, 208–211  
239 (2017).
- 240 28. J. Lu, S. Giles, M. Friedman, M. Zhu, A new stem sarcopterygian illuminates patterns of  
241 character evolution in early bony fishes. *Nat. Commun.* **8**, 1932 (2017).
- 242 29. M. Zhu, P. Janvier, A small antiarch, *Minicrania lirouyii* gen. et sp. nov., from the Early  
243 Devonian of Qujing, Yunnan (China), with remarks on antiarch phylogeny. *J. Vert.*  
244 *Paleont.* **16**, 1–15 (1996).
- 245 30. Y. Wang, M. Zhu, Redescription of *Phymolepis cui Fengshanensis* (Antiarcha:  
246 Yunnanolepididae) using high-resolution computed tomography and new insights into  
247 anatomical details of the endocranium in antiarchs. *PeerJ* **6**, e4808 (2018).
- 248 31. M. Rücklin, P. C. J. Donoghue, Z. Johanson, K. Trinajstić, F. Marone, M. Stampanoni,  
249 Development of teeth and jaws in the earliest jawed vertebrates. *Nature* **491**, 748–751  
250 (2012).

251

252 **Acknowledgements:** We thank M. Turner and T. Senden for CT scanning support, and M.  
253 Brazeau for discussion. **Funding:** This work was supported by the Strategic Priority Research  
254 Program of Chinese Academy of Sciences (XDB26000000, XDA19050102), the National Natural

255 Science Foundation of China (41872023, 41530102) and Australian Research Council Discovery  
256 grants (DP0772138, DP1092870). Y.Z., P.E.A. and M.B. were supported by Swedish Research  
257 Council grant 2014-4102 and a Wallenberg Scholarship from the Knut and Alice Wallenberg  
258 Foundation. S.G. was supported by a Royal Society Dorothy Hodgkin Research Fellowship.  
259 **Author contributions:** G.Y., J.L. and Y.Z. designed the research project; J.L., S.G., Y.Z. and  
260 Y.H. carried out the reconstruction of datasets and digital segmentation; Y.Z., S.G. and J. L.  
261 performed the phylogenetic analysis and constructed figures; M.B. and S.G. performed principal  
262 component analyses; Y.Z., J.L., S.G., and M.B. wrote the manuscript; and all authors reviewed  
263 and revised the manuscript. **Competing interests:** The authors declare no competing interests.  
264 **Data availability:** The CT data that support the findings of this study, as well as 3D surface files  
265 of described material, are shared privately in figshare for review:  
266 <https://figshare.com/s/d040d38b2e0ae3501f65>. All other data files are included in the  
267 Supplementary Materials.

268 **Supplementary Materials:**

269 *Materials and Methods*

270 *Supplementary Text*

271 *Figures S1-S6*

272 *Captions for Data S1 to S5*

273

274 **Figure legends:**

275 **Fig. 1** The skull of the ‘placoderm’ *Brindabellaspis stensioi*, based on high-resolution CT. **a**,  
276 Ventral view of endocranium (ANU 49493). **b**, Dorsal view of skull roof (AM F81911). **c**, Dorsal  
277 view of endocranial cavity (ANU 49493,); inset (**f**) shows bony labyrinth and endolymphatic sac  
278 region. **d**, Left lateral view of endocranium (ANU 49493). **e**, Right lateral view of endocranial  
279 cavity (ANU 49493). **g** and **h**, Mesial and ventral views of the skeletal labyrinth (ANU 49493).  
280 Abbreviations: a.ps, efferent pseudobranchial artery; asc, anterior semicircular canal; asc.amp,

281 ampullae of anterior semicircular canal; c.c, crus commune; conj.asc+esc, conjunction of anterior  
282 and external semicircular canals; die, diencephalon; e.endd, exit of endolymphatic duct; ends,  
283 endolymphatic sac; esc, external semicircular canal; esc.amp, ampullae of external semicircular  
284 canal; fo.hy, hypophysial fossa; hy.v, hypophysial vein; mes, mesencephalon; met,  
285 metencephalon; mye, myelencephalon; nc, nasal capsule; olf.t, olfactory tract; pit.v, pituitary vein;  
286 psc, posterior semicircular canal; psc.amp, ampullae of posterior semicircular canal; rec.p, pineal  
287 recess; rec.pap, parapineal recess; rec.utr, utricular recess; sac, sacculus; spio, spino-occipital  
288 nerves; s.su, sinus superior; tel, telencephalon; 0, terminal nerve; II, optic nerve, III, oculomotor  
289 nerve; IV, trochlear nerves; Vpro, profundus branch of trigeminal nerve; Vtg, maxillary and  
290 mandibular branches of trigeminal nerve; VI, abducens nerve; VII, facial nerve; VIII, otic nerve;  
291 IX, glossopharyngeal nerve; X, vagus nerve; Xa, anterior branch of vagus nerve. Scale bars, **a-e**,  
292 1 cm; **f-h**, 5 mm.

293 **Fig. 2** Comparative morphology of crania in selected early vertebrates, aligned and scaled to  
294 match skeletal labyrinth dimensions (grey bar). Cranial outlines (light grey) and endocast outlines  
295 (yellow) in dorsal (left) and ventral (right) views. Data sources for each genus are provided in  
296 Supplementary Information.

297 **Fig. 3** Summary phylogeny showing the evolution of the inner ear and endolymphatic complex in  
298 early vertebrates. **a**, Simplified phylogeny from the parsimony strict consensus tree (Fig. S6a). **b**,  
299 The endolymphatic complex of *Brindabellaspis* and selected crown gnathostomes in lateral view,  
300 showing the shared characters including an ascending duct and an endolymphatic sac.

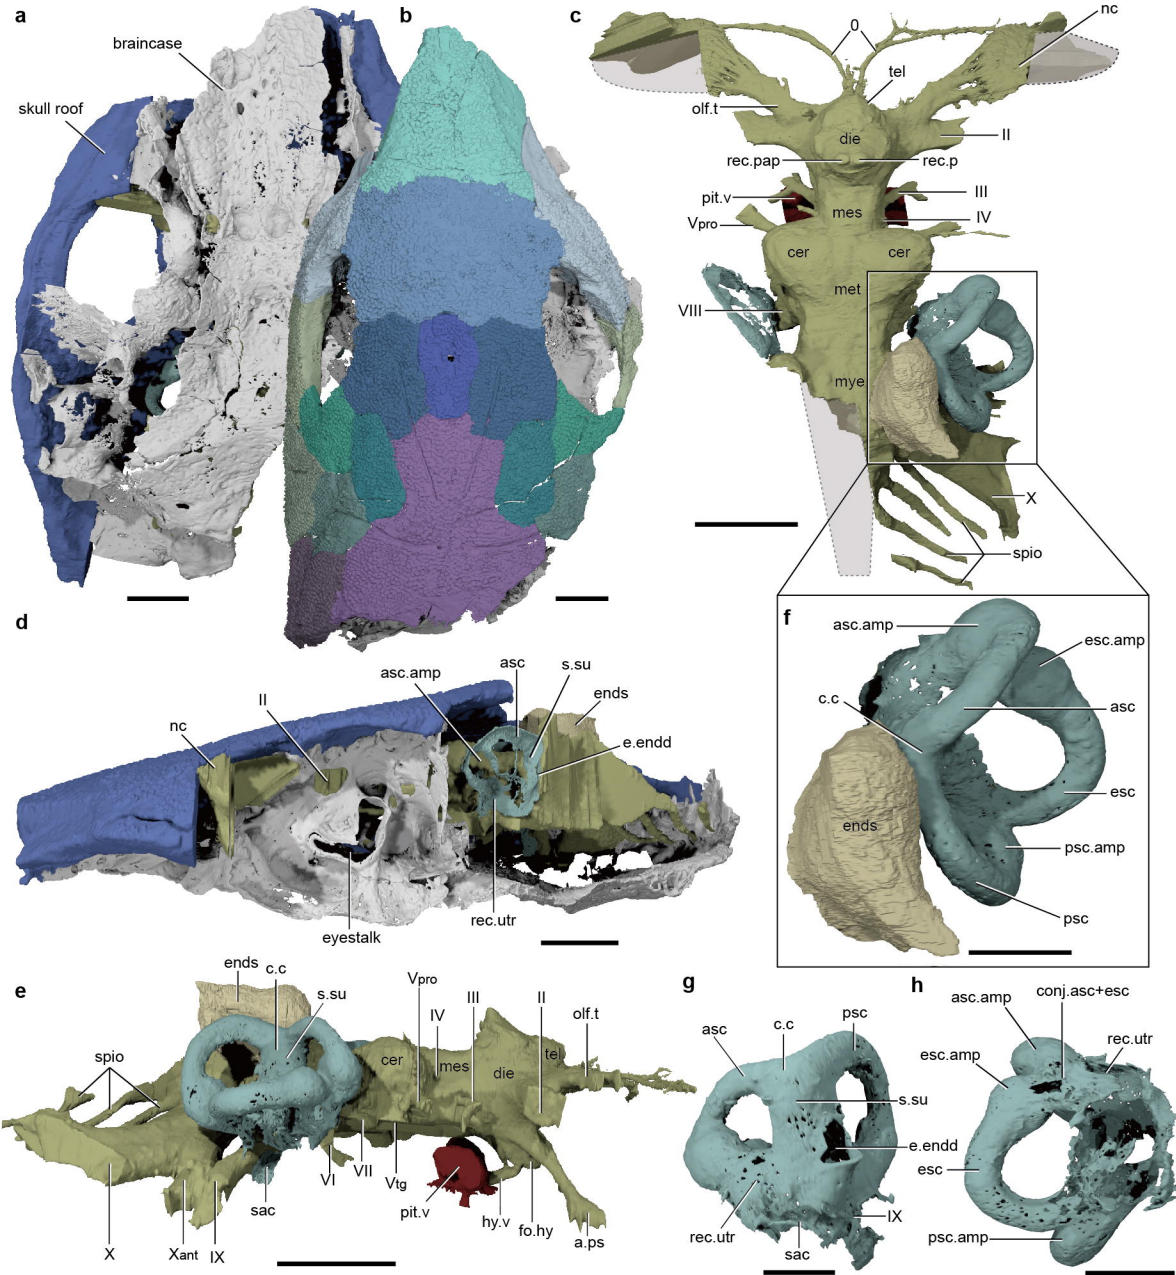



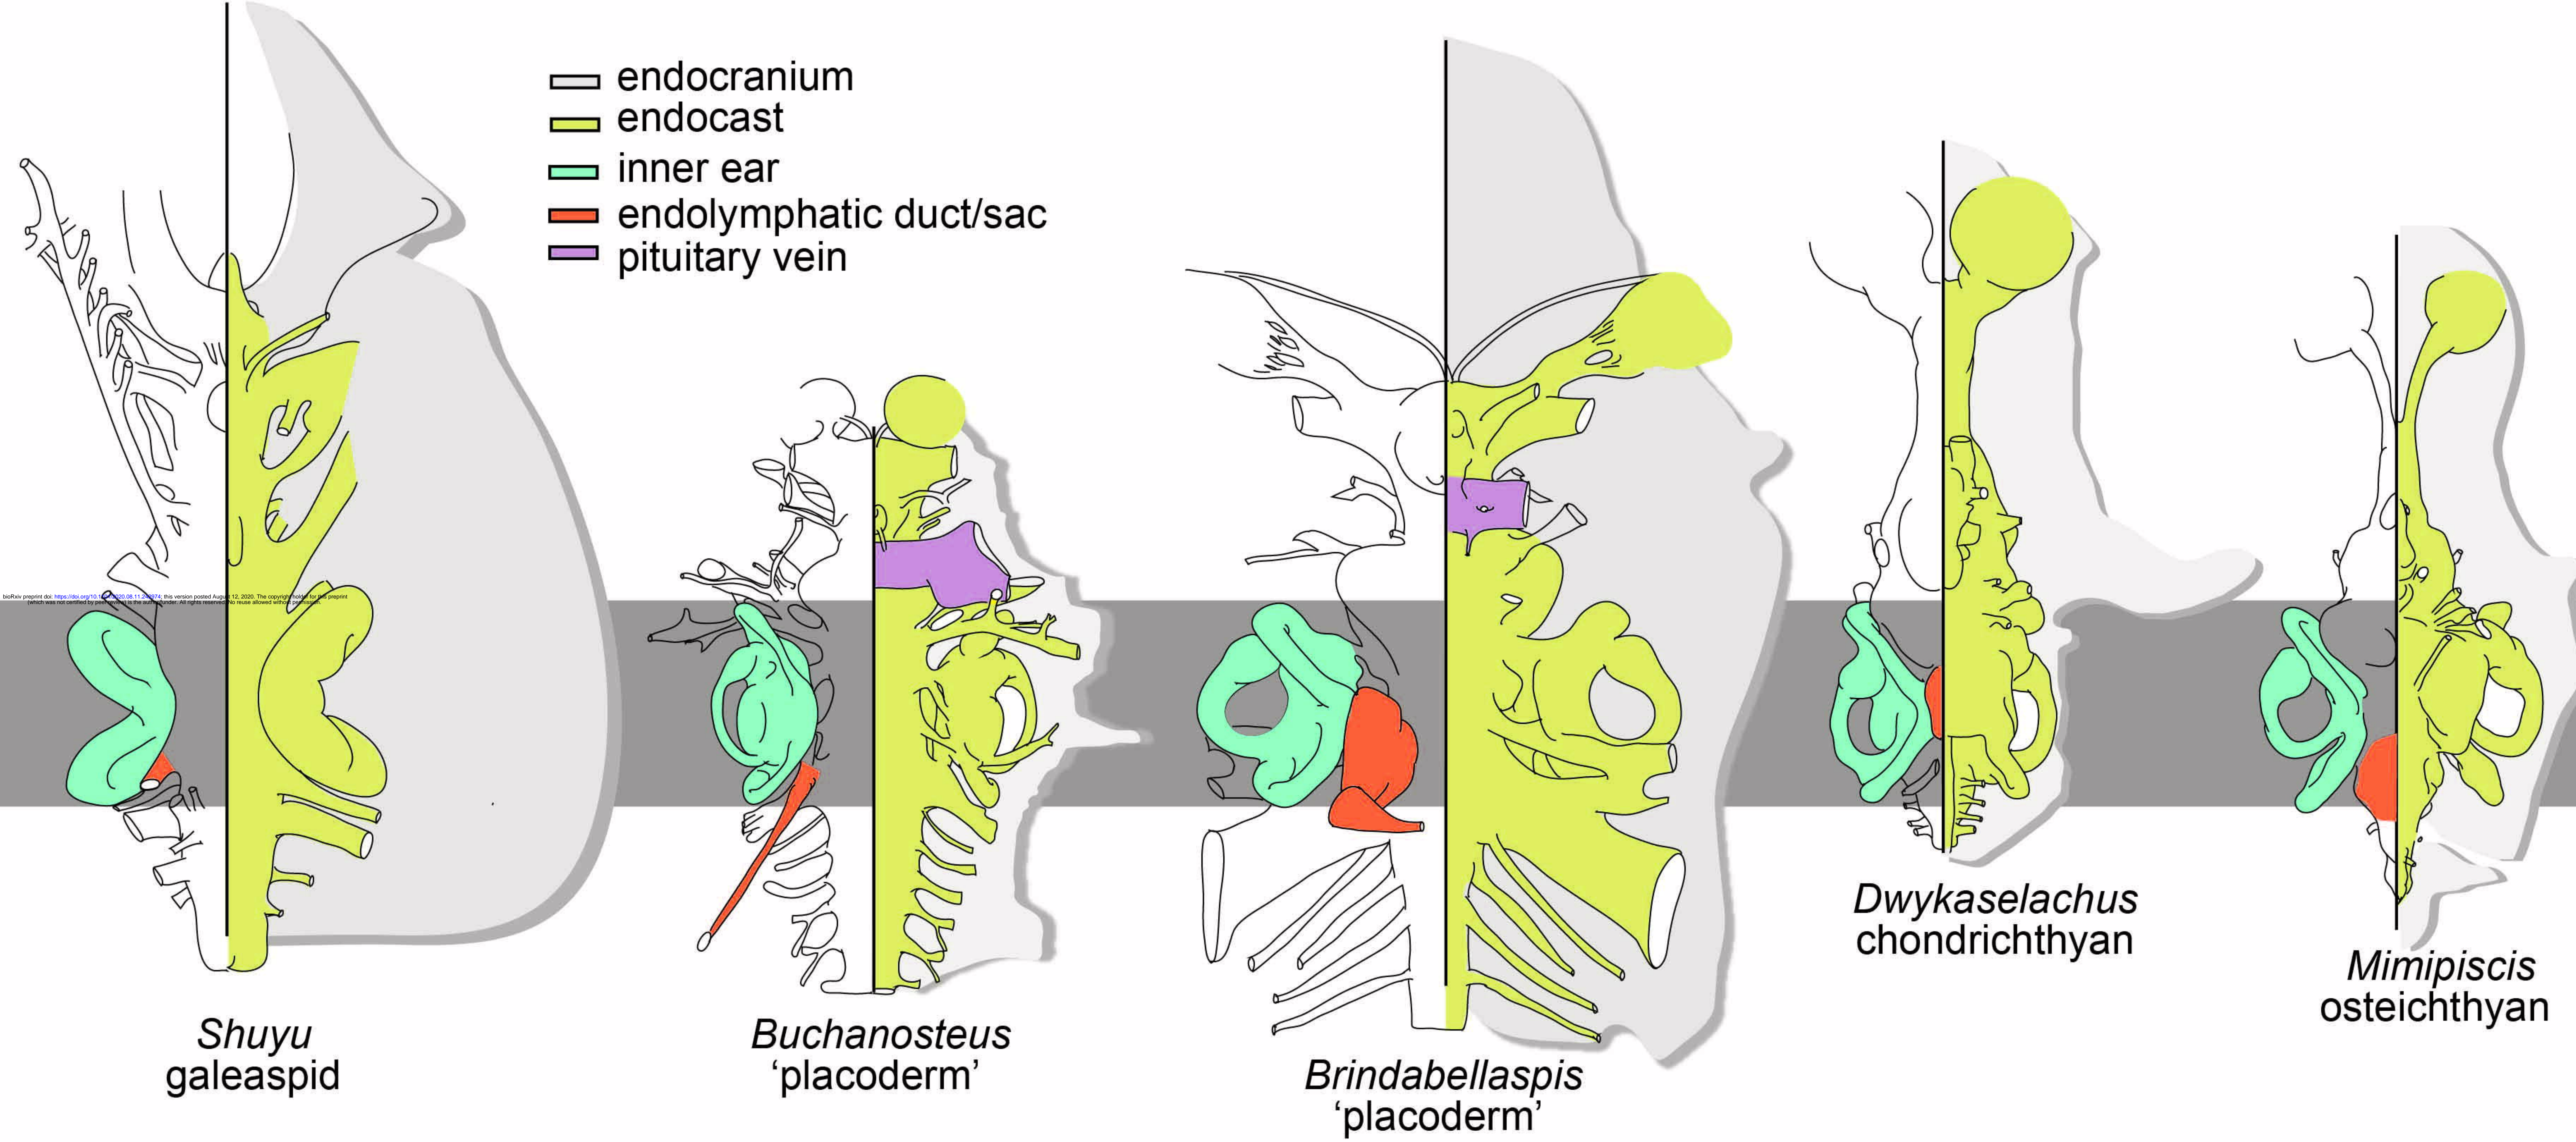

bioRxiv preprint doi: [https://doi.org/10.1101/290274](https://doi.org/10.1101/2020.08.11.290274); this version posted August 12, 2020. The copyright holder for this preprint (which was not certified by peer review) is the author/funder. All rights reserved. No reuse allowed without permission.



- Jawless fishes
- 'Placoderms'
- Crown gnathostomes
- endocast
- bony labyrinth
- vestibule
- endolymphatic complex
- nasal capsule / olfactory tracts
- telencephalon
- diencephalon
- mesencephalon

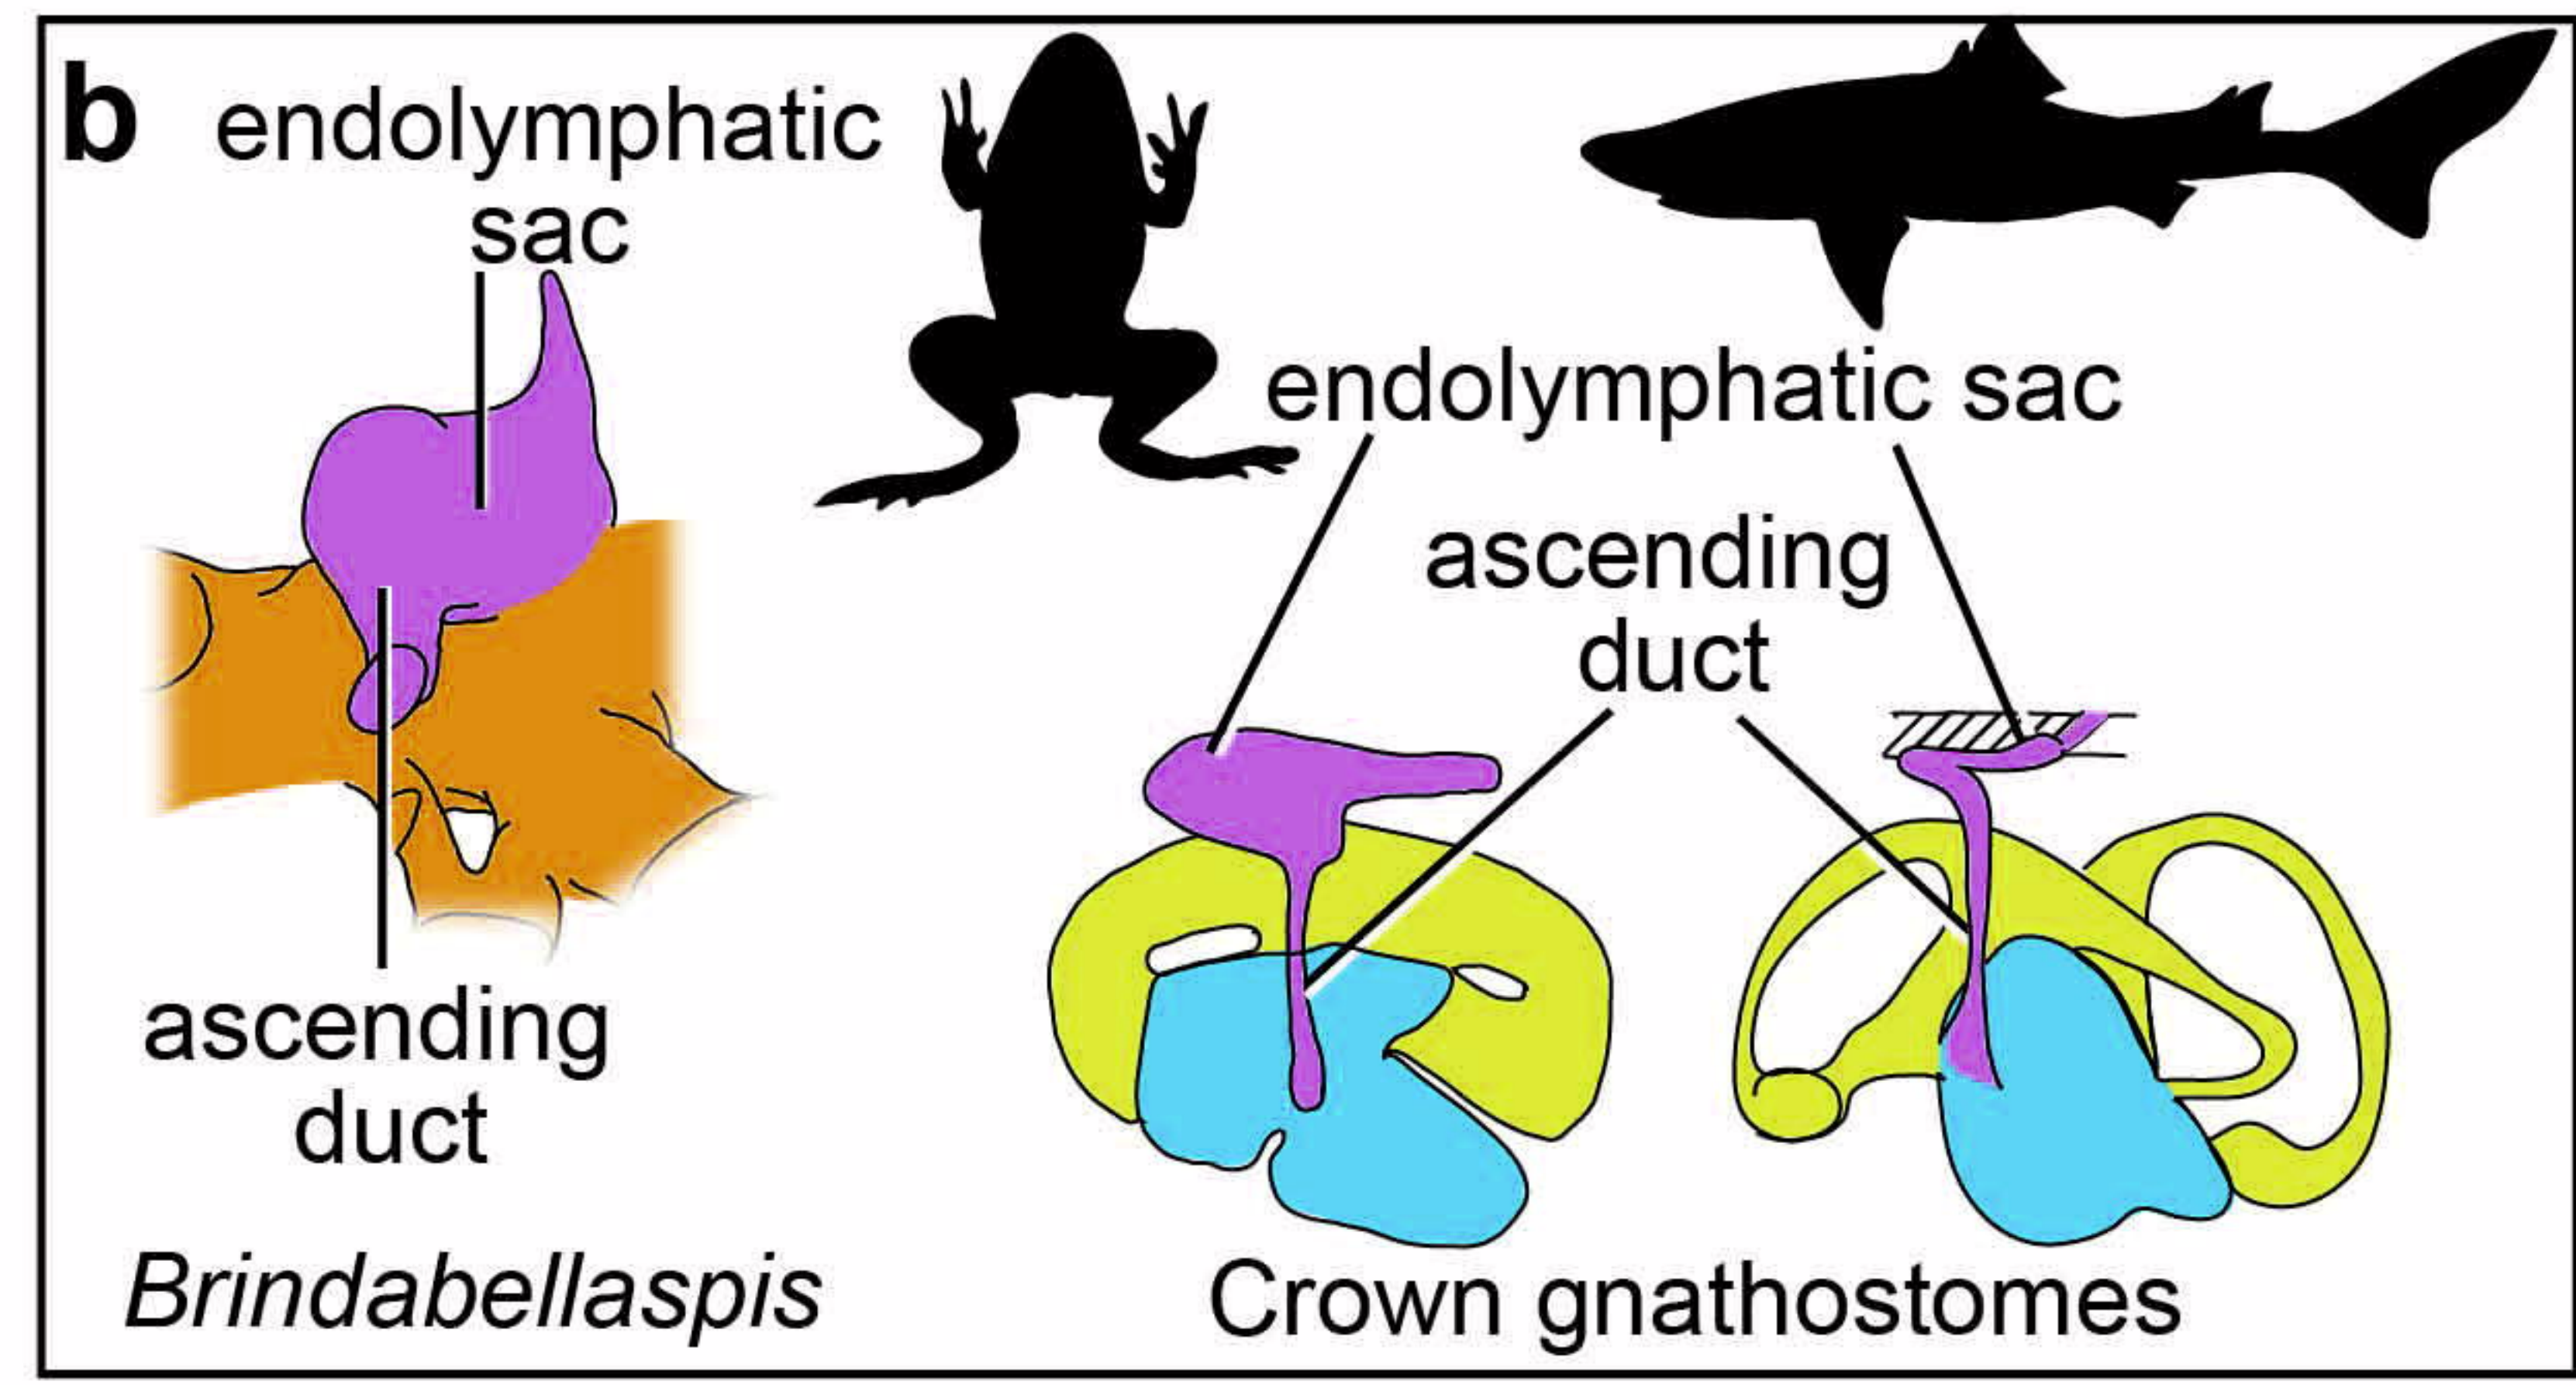

**a**

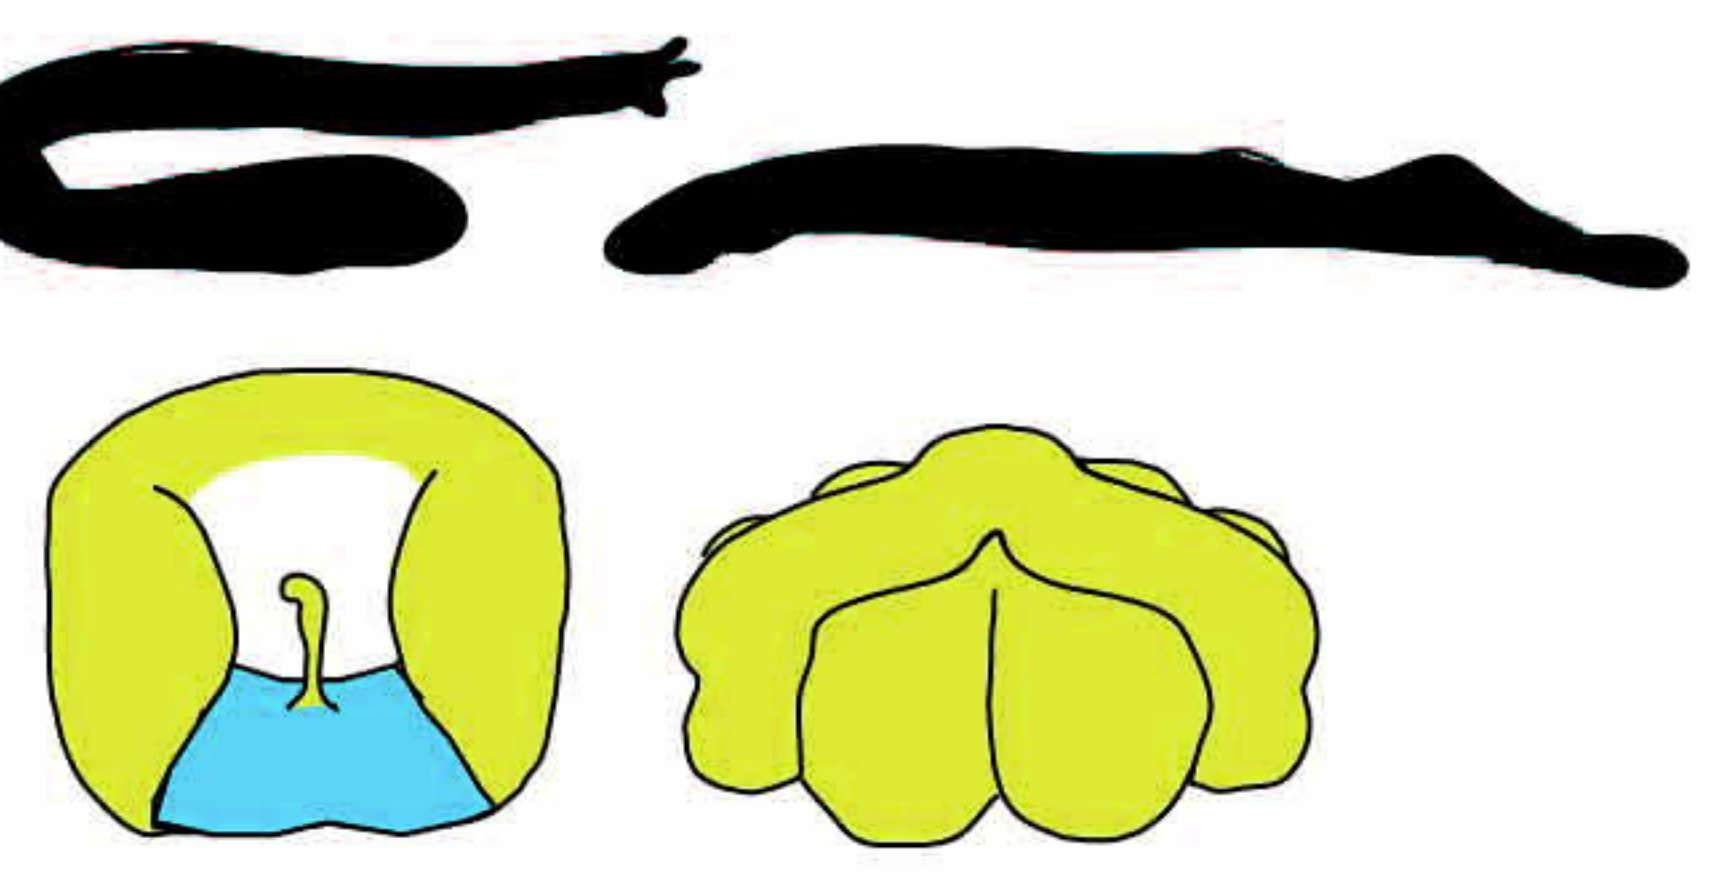

Living agnathans

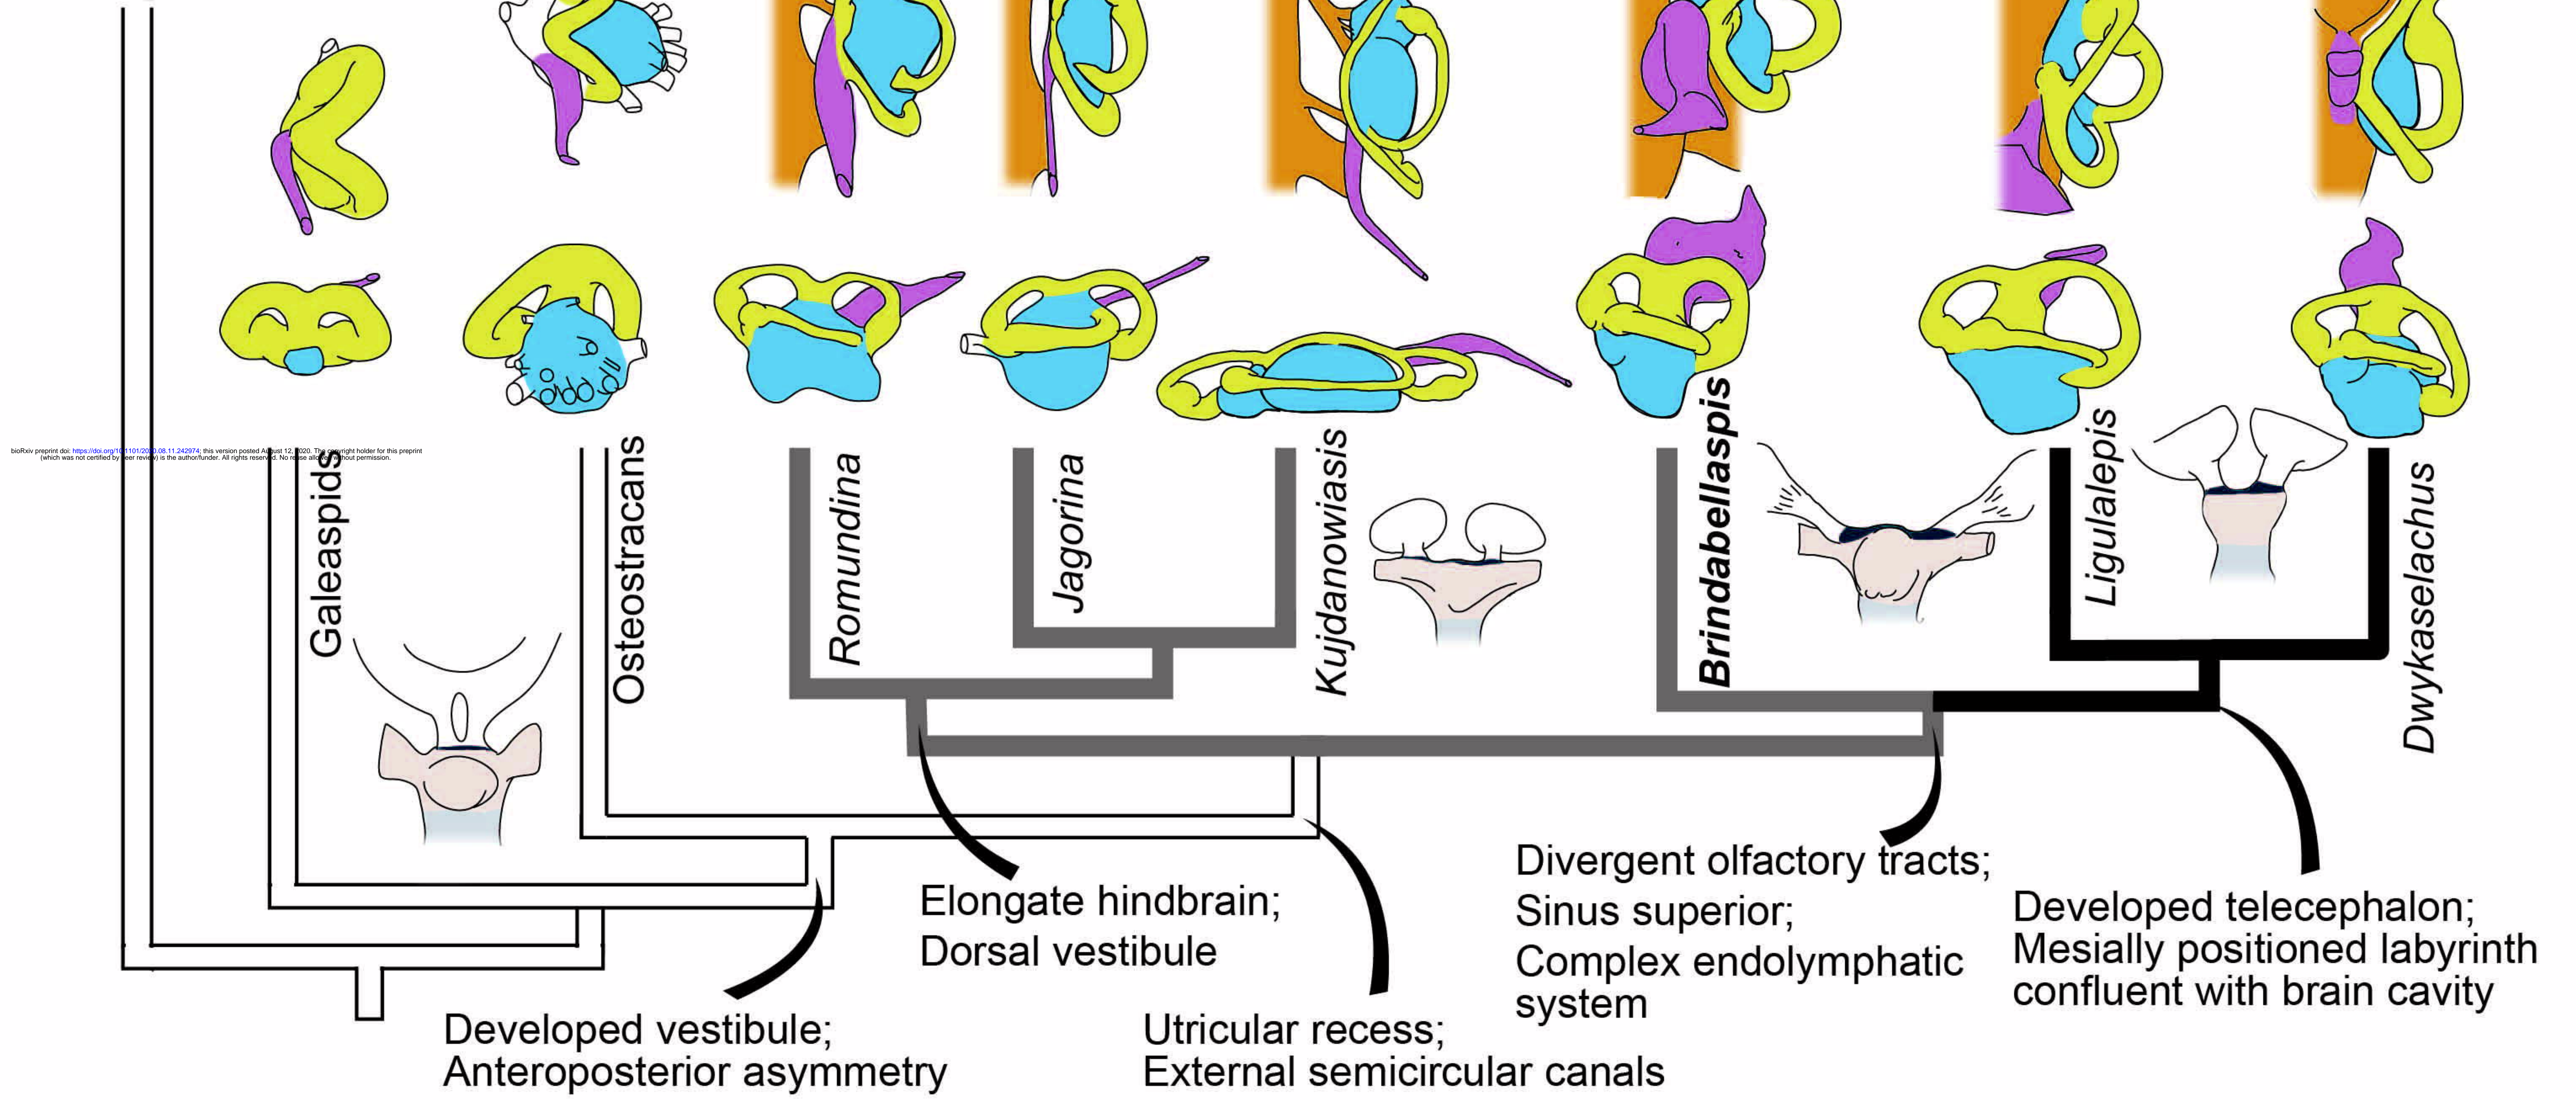

bioRxiv preprint doi: <https://doi.org/10.1101/2020.08.11.242974>; this version posted August 12, 2020. The copyright holder for this preprint (which was not certified by peer review) is the author/funder. All rights reserved. No reuse allowed without permission.
